# Supplementary material for: Attachment of hybridizable oligonucleotides to a silica support and its application for selective extraction of unmodified and antisense oligonucleotides from serum samples
Source: Royal Society of Chemistry journal article supplement (doi:10.1039/d0ra01620a), 2020-01-01
Supplement: d0ra01620a1.pdf [file d0ra01620a1.pdf]

**Attachment of hybridizable oligonucleotide to silica support and its application for selective extraction of unmodified and antisense oligonucleotides from serum samples**

Sylwia Studzińska<sup>1,\*</sup>, Magdalena Skoczylas<sup>1</sup>, Szymon Bocian<sup>1</sup>, Anna Dembska<sup>2</sup>, Bogusław Buszewski<sup>1</sup>

<sup>1</sup>Chair of Environmental Chemistry and Bioanalytics, Faculty of Chemistry,  
Nicolaus Copernicus University in Toruń,  
7 Gagarin St., PL-87-100 Toruń (Poland),

<sup>2</sup>Laboratory of Bioanalytical Chemistry, Faculty of Chemistry,  
Adam Mickiewicz University in Poznań, Bioanalytical Chemistry  
8 Uniwersytetu Poznańskiego St., 61-614 Poznań, Poland

\*e-mail: kowalska@chem.umk.pl

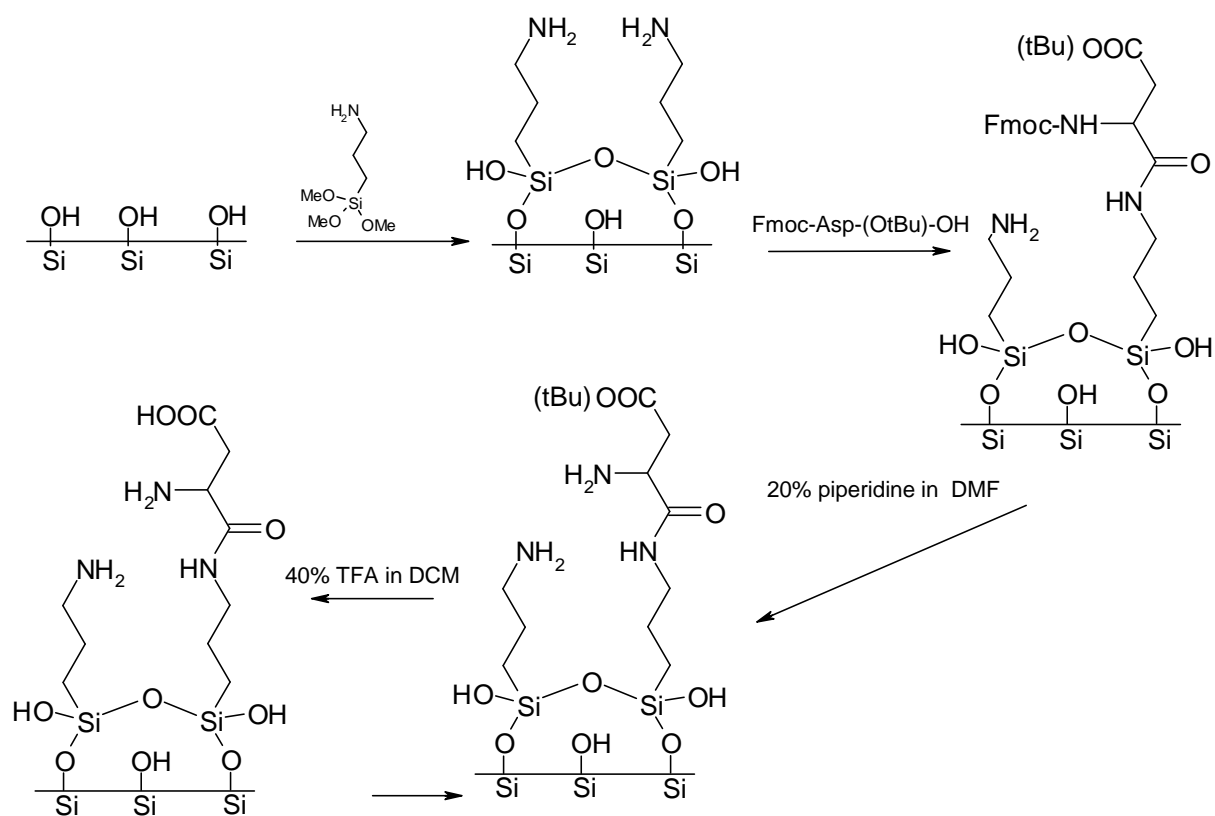

**Figure S1.** Schematic synthesis process of Si-ASP adsorbent.

Table S1. The table presenting final overall procedure.

|            |                                                                                                                                                                      |
|------------|----------------------------------------------------------------------------------------------------------------------------------------------------------------------|
| Synthesis  | 2 mg of Si-ASP,<br>15 mg of EDC,<br>40 $\mu$ L of 100 $\mu$ M DNA1 in 200 $\mu$ L of 0.1 M MES (pH 4.5),<br>1 hour at 30 °C,<br>centrifugation at 11000G, 15 minutes |
| Washing    | two portions of 200 $\mu$ L 3.3 $\times$ SSC, mixing, centrifugation at 11000G, 15 minutes                                                                           |
| Adsorption | 2 mg Si-DNA and 10 $\mu$ M DNA1 in 3.3 $\times$ SSC (total volume 200 $\mu$ L) during 40 minutes at 30 °C, centrifugation at 11000G, 15 minutes                      |
| Washing    | two portions of 200 $\mu$ L 3.3 $\times$ SSC, mixing, centrifugation at 11000G, 15 minutes                                                                           |
| Desorption | 200 $\mu$ L of water at 80°C for 1 hour, centrifugation at 11000G, 15 minutes                                                                                        |

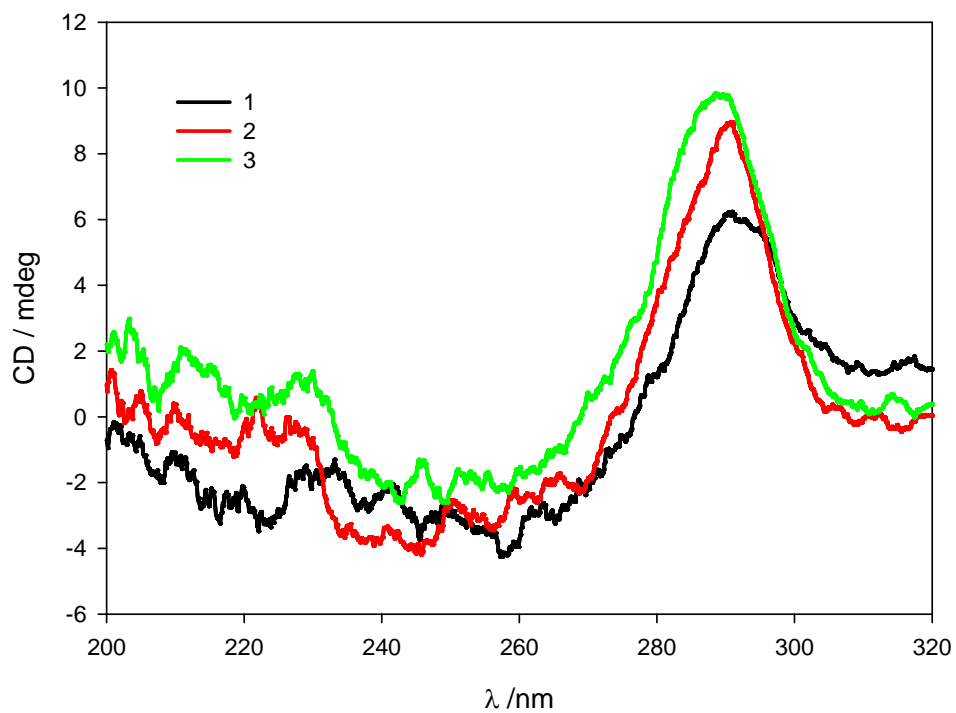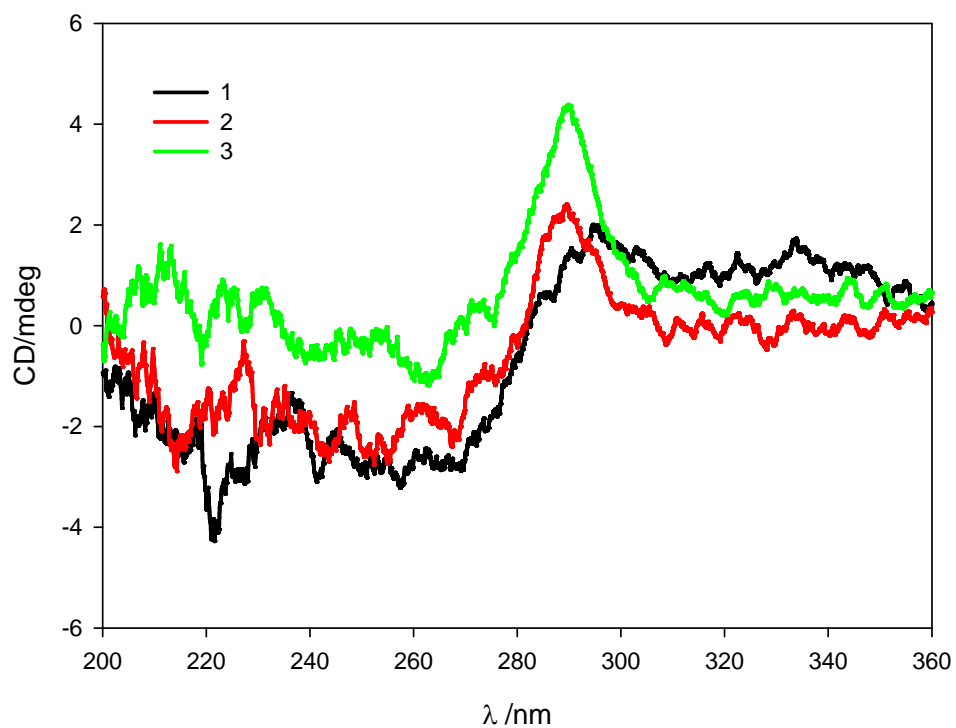

**Figure S2.** CD spectra of DNA (1,2) and DNA1 (3) oligonucleotides (1  $\mu$ M). The spectra were measured in 100 mM MES buffer, pH 4.5 with ECD (1) and 0.5 M NaCl with 50 mM citrate buffer (2,3) at 25 °C (upper panel A) and 95 °C (lower panel B) (see 2.2 section for experimental details).

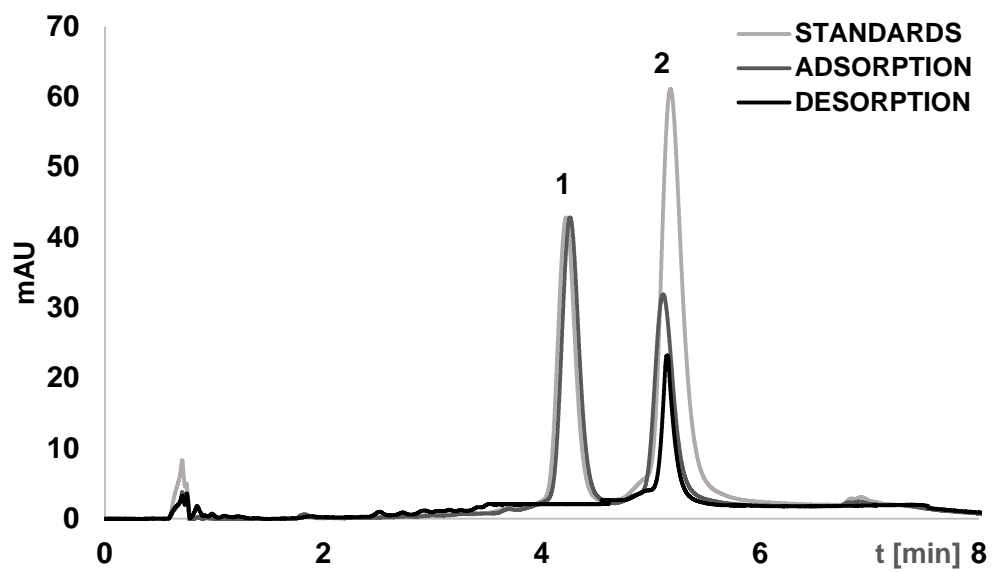

**Figure S3.** The chromatograms showing separation of DNA1 (2) and OL1 (1) mixture from the adsorption/desorption studies at Si-DNA (for chromatographic conditions see 2.2 experimental section).
